# Supplementary material
Source: Springer Nature journal article supplement (https://www.springermedizin.de/resource/supplementary/12885_2011_2711_MOESM9_ESM.pdf/9461760)
Supplement: MOESM9 [file 9461760]

# NSC 696154

# NSC 702154

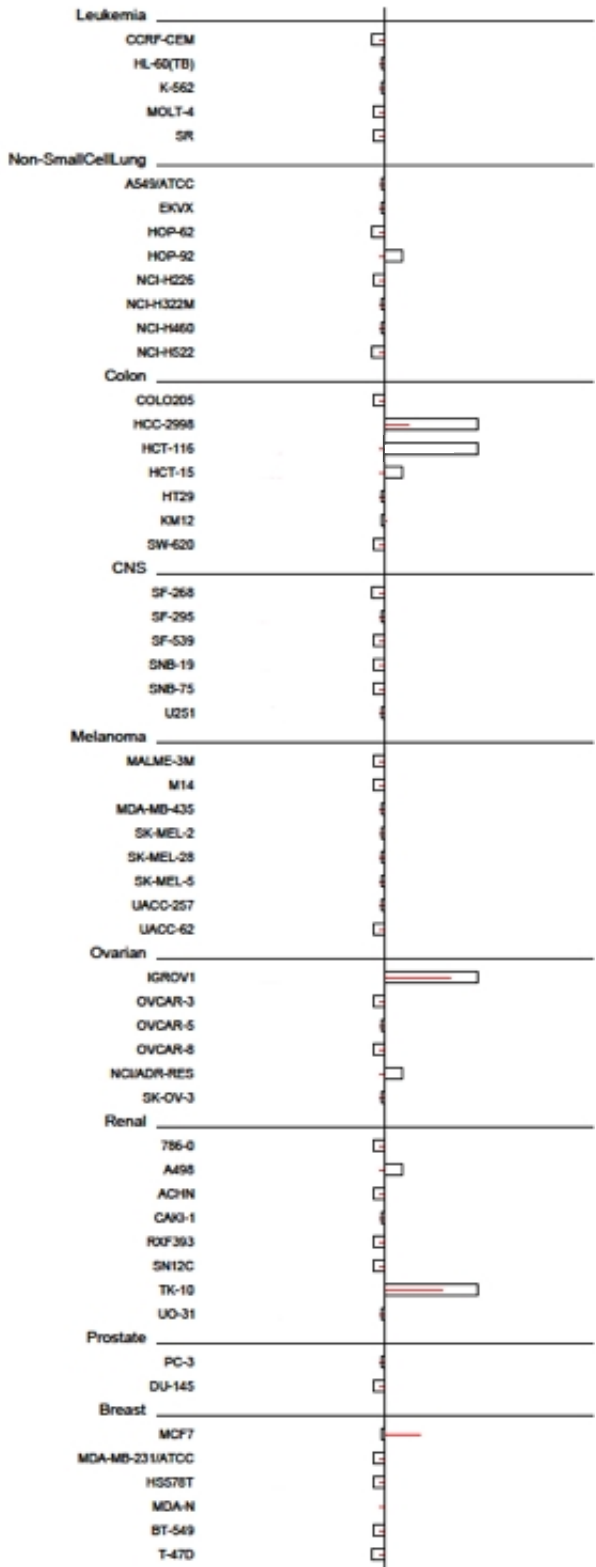

S phase arrest  $\rightleftarrows$  no S phase arrest  
 resistant  $\rightleftarrows$  sensitive

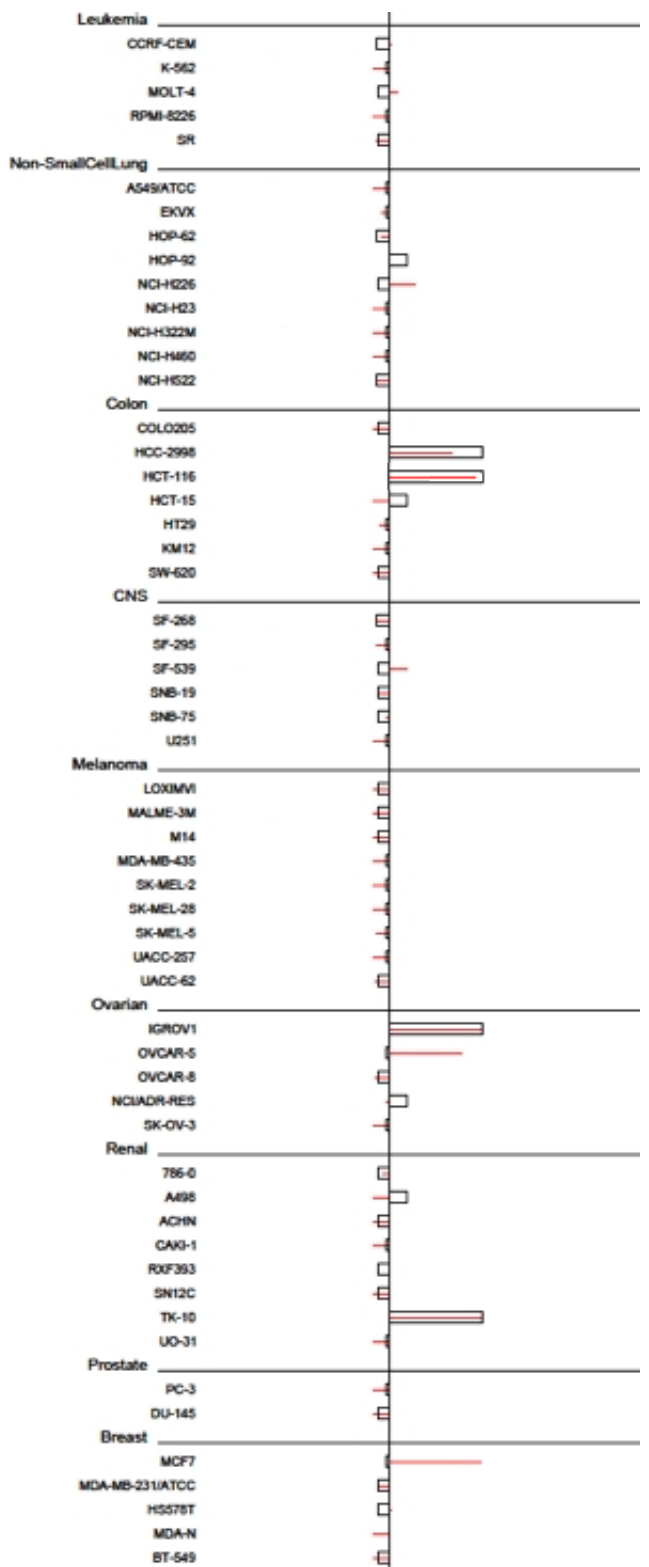

S phase arrest  $\rightleftarrows$  no S phase arrest  
 resistant  $\rightleftarrows$  sensitive
